# Supplementary material for: COVID-19 Preparedness and Perceived Safety in Nursing Homes in Southern Portugal: A Cross-Sectional Survey-Based Study in the Initial Phases of the Pandemic
Source: Int J Environ Res Public Health. 2021 Jul 28;18(15):7983. doi: 10.3390/ijerph18157983 (PMC8345424; doi:10.3390/ijerph18157983)
Supplement: Supplementary file 1 [file ijerph-18-07983-s001.zip]

Archive with 16 entries (16 files):
- File S1.pdf
- __MACOSX/._File S1.pdf
- File S2.pdf
- __MACOSX/._File S2.pdf
- File S3.pdf
- __MACOSX/._File S3.pdf
- File S4.pdf
- __MACOSX/._File S4.pdf
- File S5.pdf
- __MACOSX/._File S5.pdf
- File S6.pdf
- __MACOSX/._File S6.pdf
- File S7.pdf
- __MACOSX/._File S7.pdf
- File S8.pdf
- __MACOSX/._File S8.pdf
